# Supplementary material for: Decreased Serum Maresin 1 Concentration Is Associated With Postmenopausal Osteoporosis: A Cross-Sectional Study
Source: Frontiers journal article supplement (doi:10.3389/fmed.2021.759825), 2022-01-10
Supplement: Table_1.xlsx [file Table_1.xlsx]

## Sheet: Sheet1
				Table S1. Source data (Osteopenia group)
Age (years)	BMI (kg/m2)	Waist (cm)	FPG (mmol/L)	TG (mmol/L)	TC (mmol/L)	HDL-C (mmol/L)	LDL-C (mmol/L)	Ca (mmol/L)	P (mmol/L)	PTH (pg/ml)	25(OH)D (ng/ml)	CTX (ng/ml)	PINP (ng/ml)	TRAP5b (U/L)	OC (ng/ml)	Maresin 1 (pg/ml)	Femoral neck BMD (g/cm2)	Lumbar spine BMD (g/cm2)	Hip BMD (g/cm2)
52	18.82	70	4.8	5.52	1.08	1.35	3.82	2.37	1.44	33.27	33.27	0.48	43.66	4.83	18.51	120.207	0.723	0.999	0.813
56	19.63	78	5.52	4.87	1.99	1.04	3.42	2.48	1.32	32.45	35.12	0.35	41.19	4.63	14.91	149.846	0.736	0.878	0.804
56	29.06	92	5.68	5.92	1.93	1.36	3.97	2.33	1.04	24.75	32.88	0.42	39.84	5.55	16.11	119.215	0.851	0.875	0.957
56	27.26	82	5.25	2.65	1.25	1.06	1.22	2.33	1.42	34.53	29.3	0.56	50.17	4.99	16.05	85.6338	0.809	0.923	0.883
62	18.63	89	4.65	5.95	3.25	1.23	4.02	2.24	1.4	29.14	31.67	0.34	48.94	4.96	13.26	97.7876	0.831	1.196	1.006
56	23.72	82	5.24	5.47	1.15	1.35	3.77	2.35	1.39	33.27	36.13	0.44	48.36	5.26	14.84	99.1056	0.767	0.999	0.791
57	22.72	91	5.06	5.71	3.2	1.2	3.71	2.31	1.23	34.52	27.34	0.5	51.92	4.78	12.65	181.158	0.784	1.088	0.785
55	21.03	74	5.16	6.91	1.25	1.6	5.18	2.29	1.08	32.16	35.55	0.54	46.74	5.32	19.29	89.8049	0.862	0.916	0.871
54	19.14	67	4.43	4.21	0.55	1.96	2.14	2.45	1.36	29.38	32.77	0.41	41.38	4.14	10.84	105.433	0.916	1.136	1.018
54	23.83	91	5.49	3.44	0.91	0.96	2.14	2.35	1.15	29.46	30.25	0.57	43.76	4.42	13.15	134.038	0.813	0.876	0.821
54	32.88	82	4.74	6.35	2.88	1.43	4.03	2.32	1.34	27.31	35.19	0.63	39.89	4.49	17.21	69.9966	0.802	0.899	0.761
63	29.32	98	4.54	4.5	2.08	1.19	2.88	2.25	1.17	35.37	32.34	0.49	39.62	5.1	16.57	128.752	0.797	0.965	0.832
54	19.9	73	4.48	6.05	1.89	1.5	4.01	2.35	1.34	30.21	31.36	0.57	41.03	4.76	16.74	123.485	0.919	1.01	0.977
58	22.81	75	5	5.47	1.06	1.68	3.57	2.33	1.27	30.28	31.38	0.67	51.94	5.03	17.56	69.6327	0.845	1.008	0.944
55	25.05	81	4.36	5.36	1.06	1.53	3.42	2.33	1.23	32.73	31.24	0.51	44.63	4.79	18.27	210.282	0.83	0.842	0.843
56	26.72	80	4.88	4.63	1.56	1.73	2.98	2.36	1.23	29.34	32.24	0.42	45.19	4.45	14.15	168.419	0.812	1.012	0.802
58	25.66	85	5.32	6	1.54	1.14	4.5	2.36	1.53	30.36	31.57	0.42	42.37	5.63	13.01	152.688	0.848	1.044	0.84
63	22.41	71	4.56	5.37	1.35	2.12	2.55	2.28	1.04	36.37	29.33	0.51	44.27	5.16	15.24	166.882	0.862	0.916	0.871
60	20.81	81	5.07	6.05	1.37	1.88	3.44	2.43	1.47	31.53	27.32	0.55	41.83	4.52	12.28	153.199	0.836	1.171	0.949
57	22.25	70	5.23	6.98	1.73	1.53	4.95	2.34	1.28	32.26	28.43	0.47	44.42	4.77	15.83	173.915	0.931	1.199	1.165
58	21.53	71	4.49	4.72	0.76	1.64	2.79	2.33	1.41	30.53	27.98	0.57	42.36	5.14	16.72	132.467	0.87	1.116	0.888
57	18.65	80	5.47	5.28	1.72	1.37	3.96	2.27	1.02	31.25	34.67	0.6	50.83	4.84	16.28	139.701	0.805	1.024	0.868
60	23.44	83	5.31	4.98	0.97	1.07	3.82	2.34	1.27	28.37	35.33	0.53	47.74	5.05	15.92	127.436	0.897	0.942	0.941
58	23.44	80	5.51	5.27	0.75	1.72	2.31	2.44	1.34	34.63	29.82	0.35	46.28	4.55	12.32	152.199	0.812	0.928	0.76
56	22.43	79	4.88	5.85	0.98	1.37	3.91	2.39	1.45	27.84	34.51	0.45	41.36	4.89	15.84	141.714	0.744	0.924	0.906
54	19.89	78	4.7	5.91	0.68	2.08	3.61	2.38	1.35	29.36	28.87	0.47	47.83	4.66	16.71	161.325	0.827	1.048	0.833
53	17.19	75	5.34	7.39	1.88	1.55	5.63	2.42	1.41	36.57	28.16	0.48	46.52	5.25	18.32	118.739	0.819	0.919	0.861
53	22.64	96	4.41	3.71	1.98	1.16	1.89	2.35	1.43	30.03	31.29	0.6	50.17	4.95	15.67	135.687	0.843	1.009	0.892
56	24.43	89	5.02	5.29	1.07	1.22	3.79	2.31	1.07	27.37	33.65	0.5	46.24	4.64	15.79	142.177	0.906	1.075	1.073
56	29.09	93	5.38	3.44	0.55	1.25	2.11	2.35	1.17	25.84	34.23	0.53	42.39	4.77	12.36	162.466	0.812	0.787	0.74
58	24.24	82	5.4	5.93	1.52	1.65	3.74	2.48	1.62	27.37	26.55	0.43	39.35	5.36	14.25	129.151	0.811	0.98	0.883
59	24.97	86	5.83	5.16	1.07	1.73	2.34	2.29	1.32	28.62	27.81	0.42	40.22	4.7	17.11	131.873	0.793	0.936	0.892
59	24.12	86	5.43	4.64	1.67	1.11	3.44	2.37	1.33	26.25	27.85	0.43	43.74	4.97	14.56	124.649	0.826	0.974	0.923
60	35.55	75	4.27	4.94	1.2	1.51	3.39	2.39	1.24	29.03	33.26	0.51	47.28	5.15	13.95	132.675	0.927	0.946	0.758
59	22.64	79	4.92	5.79	0.84	1.71	3.71	2.38	1.2	28.78	34.76	0.43	40.35	5.11	14.36	153.172	0.814	0.928	0.834
62	23.92	74	5.21	4.09	1.06	2.04	1.58	2.43	1.42	35.46	28.21	0.39	39.71	5.36	16.73	131.401	0.933	1.03	0.916
61	19.3	67	4.19	5.83	1.1	1.69	3.83	2.28	1.04	32.37	26.55	0.57	45.88	4.49	12.88	125.732	0.765	0.935	0.89
56	20.47	82	4.21	5.44	0.79	2.06	2.58	2.23	1.47	29.31	29.54	0.49	46.34	4.81	16.07	134.567	0.836	0.899	0.872
55	26.64	79	4.99	5.11	1.33	1.43	3.39	2.4	1.38	28.39	26.59	0.53	42.56	4.82	15.31	127.932	0.812	0.938	0.796
57	24.92	81	4.86	6.08	1.66	1.28	4.55	2.35	1.25	30.21	34.27	0.37	42.37	4.45	15.06	136.806	0.893	0.941	0.987
57	25.39	82	4.66	5.72	0.89	2.25	3.19	2.2	1.24	26.54	33.16	0.46	46.57	4	14.27	172.914	0.867	0.962	0.892
59	22.09	76	4.77	4.09	0.96	1.64	2.07	2.21	1.25	27.88	31.1	0.45	39.08	6.17	13.44	165.975	0.831	0.884	0.853
63	23.73	82	5.06	3.74	1.42	1.44	1.65	2.24	1.33	29.37	31.31	0.39	43.71	4.19	13.14	195.581	0.871	0.979	0.961
57	26.37	75	4.97	6.21	1.42	1.51	4.29	2.32	1.3	30.23	30.66	0.46	48.26	4.94	17.35	187.531	0.839	0.984	0.93
53	21.18	81	5.18	5.29	1	1.49	3.51	2.28	1.28	32.18	26.58	0.49	51.37	5.56	15.62	162.181	0.781	1.032	0.872
56	25.31	92	4.36	4.48	2.13	1	2.55	2.42	1.36	28.93	29.83	0.51	45.33	4.93	14.25	160.777	0.827	0.965	0.869
57	24.25	96	4.32	5.13	1.32	1.8	2.5	2.25	1.43	30.21	33.76	0.42	48.31	4.49	17.35	179.866	0.79	1.025	0.914
59	29.33	93	4.46	5.4	2.17	1.25	3.44	2.31	1.34	33.23	30.15	0.48	40.96	3.83	12.38	158.323	0.806	0.976	0.791
